# 1 Population-scale proteome variation in 2 human induced pluripotent stem cells

3  
4 Bogdan A Mirauta<sup>1,\*</sup>, Daniel D Seaton<sup>1,\*</sup>, Dalila Bensaddek<sup>2,\*</sup>, Alejandro Brenes<sup>2</sup>,  
5 Marc J Bonder<sup>1</sup>, Helena Kilpinen<sup>1,†</sup>, HipSci Consortium, Oliver Stegle<sup>1,3,4#</sup>, Angus I  
6 Lamond<sup>2,#</sup>

7  
8 <sup>1</sup> European Molecular Biology Laboratory, European Bioinformatics Institute,  
9 Wellcome Genome Campus, Hinxton, Cambridge CB10 1SD, UK

10 <sup>2</sup> Centre for Gene Regulation & Expression, School of Life Sciences, University of  
11 Dundee, Dundee, DD1 5EH, UK

12 <sup>3</sup> European Molecular Biology Laboratory, Genome Biology Unit, 69117 Heidelberg,  
13 Germany

14 <sup>4</sup> Division of Computational Genomics and Systems Genetics, German Cancer  
15 Research Center, 69120 Heidelberg, Germany

16  
17 \* equal contribution

18 # equal contribution

19 † present address: UCL Great Ormond Street Institute of Child Health, University  
20 College London, London WC1N 1EH, UK

21  
22 Correspondence to: [a.i.lamond@dundee.ac.uk](mailto:a.i.lamond@dundee.ac.uk), [oliver.stegle@ebi.ac.uk](mailto:oliver.stegle@ebi.ac.uk)

23

24

25

26

27

28

## 29 Abstract

30 Realising the potential of human induced pluripotent stem cell (iPSC) technology for drug  
31 discovery, disease modelling and cell therapy requires an understanding of variability across  
32 iPSC lines. While previous studies have characterized iPS cell lines genetically and  
33 transcriptionally, little is known about the variability of the iPSC proteome. Here, we present  
34 the first comprehensive proteomic iPSC dataset, analysing 202 iPSC lines derived from 151  
35 donors. We characterise the major genetic determinants affecting proteome and transcriptome  
36 variation across iPSC lines and identify key regulatory mechanisms affecting variation in  
37 protein abundance. Our data identified >700 human iPSC protein quantitative trait loci  
38 (pQTLs). We mapped *trans* regulatory effects, identifying an important role for protein-protein  
39 interactions. We discovered that pQTLs show increased enrichment in disease-linked GWAS  
40 variants, compared with RNA-based eQTLs.

41

## 42 Introduction

43 Induced pluripotent stem cells (iPSC) hold enormous promise for advancing basic research  
44 and biomedicine. By enabling the *in vitro* reconstitution of development and cell differentiation,  
45 iPS cells allow the investigation of mechanisms underlying development and the aetiology of  
46 many forms of genetic disease. To realize this potential, it is essential to characterize how  
47 genetic and non-genetic effects in human iPSCs influence molecular and cellular phenotypes.

48

49 Recently, the establishment of population reference panels of normal human iPSC lines<sup>1-3</sup>  
50 have provided valuable resources for functional experiments in different genetic backgrounds.  
51 Additionally, these data have yielded detailed characterizations of the iPS transcriptome,  
52 identifying thousands of *cis* expression Quantitative Trait Loci (eQTL)<sup>1,4,5</sup>, including at disease-  
53 relevant loci. While these RNA-based analyses are informative for studying mechanisms  
54 affecting gene regulation at the transcriptional level, most cellular phenotypes involve  
55 mechanisms acting downstream, at the protein level. Evidence in other contexts, including in  
56 lymphoblast cell lines and in cancer, point to substantial differences in the genetic regulation  
57 of protein and RNA traits, identifying protein QTL<sup>6-9</sup> and assessing the extent of buffering of  
58 genetic effects between layers<sup>10,11</sup>. However, existing protein datasets have been limited by  
59 scale (i.e. number of samples) or resolution (i.e. number of proteins, availability of RNA data).  
60 Importantly, no population-scale proteome datasets have been generated from human  
61 pluripotent cells.

62

63 Here, we report on the first comprehensive, population-scale, combined proteomics and gene  
64 expression analysis in human iPSC lines. Our data comprise matched quantitative proteomic  
65 (TMT Mass Spectrometry) and transcriptomic (RNA-seq) profiles of 202 iPSC lines, derived  
66 from 151 donors that are part of the HipSci project<sup>1</sup>. We identify both genetic and non-genetic  
67 effects causing variability in protein expression between individuals. Our data provide the first  
68 high-resolution map of protein quantitative trait loci (pQTLs) in human iPSCs, which we  
69 characterise in relation to regulatory variants that affect the iPSC transcriptome. This reveals  
70 important roles for protein-protein interactions in propagating and buffering genetic effects on  
71 the human proteome. Additionally, we identify pQTLs linked to GWAS loci, underlining the  
72 importance of direct protein measurements for the characterisation of disease mechanisms.

73

74

75

## 76 Results

### 77 A population reference proteome for human iPSCs

78 We selected 217 iPSC lines from the HipSci project<sup>1</sup>, which were derived from 163 different  
79 donors, for protein analysis. Quantitative mass spectrometry was carried out in batches of 10,  
80 using tandem mass tagging (TMT<sup>12</sup>), including one common reference iPSC line that was  
81 included in each batch (**Methods**). After quality control (**Supp. Fig. 1; Methods**), we selected  
82 202 lines (from 151 donors) for which genotype, RNA-seq and proteome information is  
83 available, for further analysis (**Fig. 1A; Supp. Table 1**).

84

85 In aggregate, our proteomics data identified >250,000 distinct (unmodified) peptide  
86 sequences, corresponding to 16,218 protein groups (hereon denoted proteins) with a median  
87 sequence coverage of 46% (**Supp. Table 2**), and that map to 10,394 protein coding genes.  
88 Of these, 11,542 protein groups corresponding to 9,993 genes were detected in more than 30  
89 lines and were considered for downstream analysis (**Supp. Fig. 2**). RNA-seq data from the  
90 same iPSC lines identified 12,363 expressed protein-coding genes (TPM>1), ~75% of which  
91 had evidence for expression at the protein level (**Fig. 1B; Supp. Fig. 3**). The average  
92 abundance for cognate protein and RNA expression in iPSCs was positively correlated across  
93 genes (**Fig. 1C**), consistent with observations in other cell types and organisms<sup>13,14</sup>.

94

95 Our data provide the most comprehensive analysis of the human iPSC proteome reported to  
96 date, and one of the most comprehensive proteomic datasets reported for any human primary  
97 or derived cell type (**Supp. Table 3**). Comparison of iPSC lines derived from both healthy and  
98 disease bearing donors (**Supp. Table 4**), indicates no substantial global disease-linked  
99 differences, at either proteome or transcriptome levels (**Supp. Fig. 4**). Notably, when we  
100 compared the iPSC proteome with the Human Proteome Map<sup>15</sup>, foetal and reproductive  
101 organs were identified as the tissues with the most similar protein expression patterns to iPS  
102 cells (**Fig. 1D**). This is consistent with the expression of pluripotency markers in foetal testis  
103 and ovaries<sup>16,17</sup>.

104

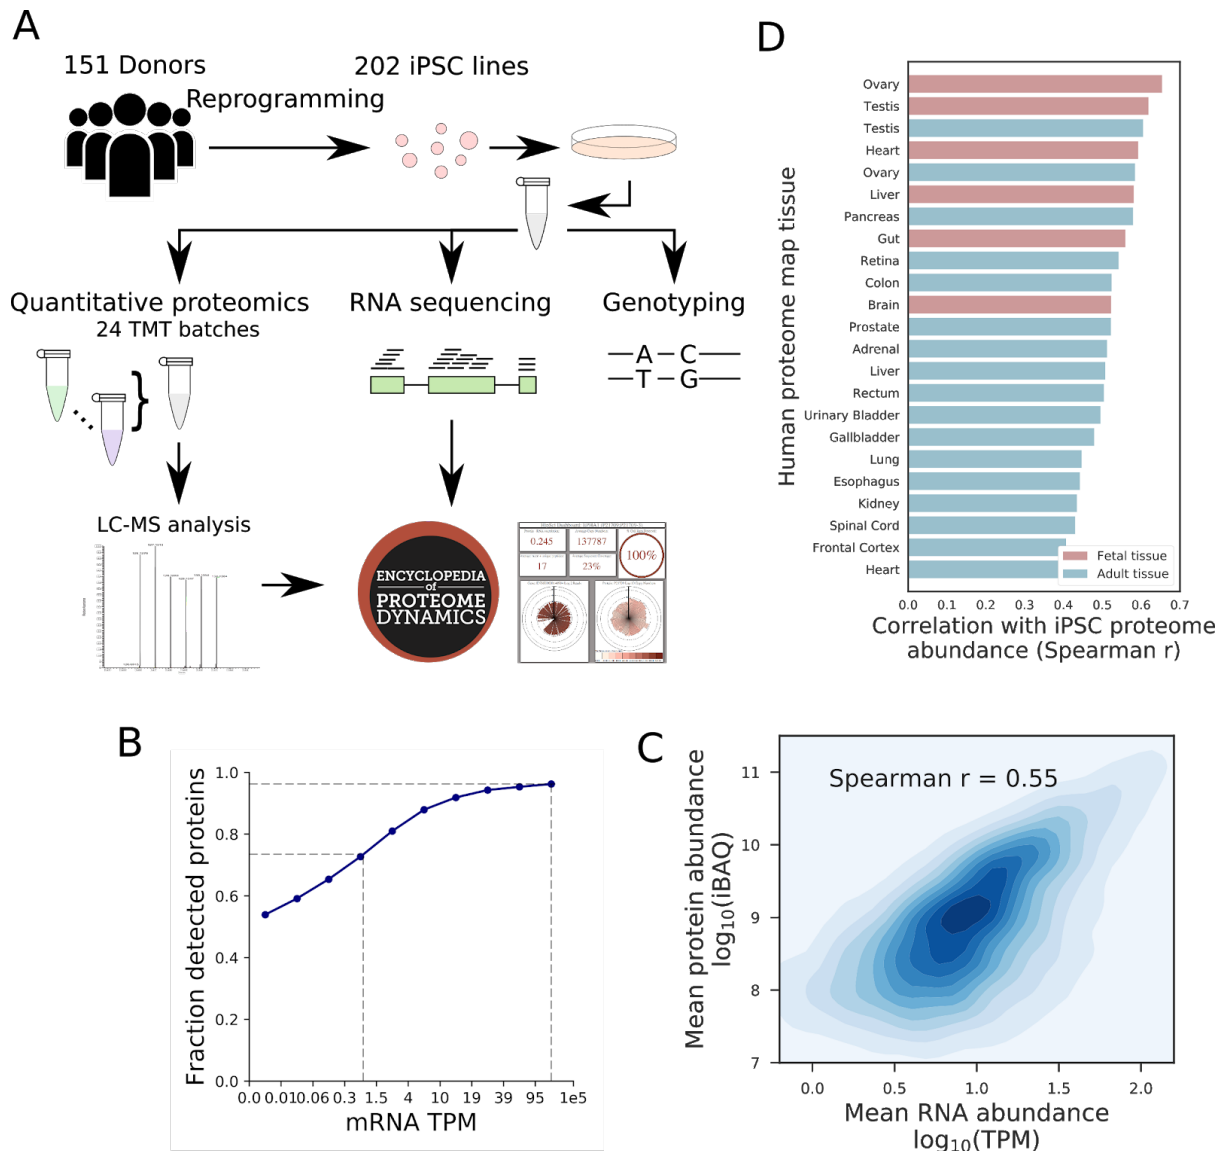

105

106 **Figure 1 | Molecular profiling of iPSC lines. (A)** Experimental design, displaying assays considered  
 107 in this study. Genotype, RNA-seq and quantitative proteomics data were generated from the same cell  
 108 lines. **(B)** Aggregate proteome coverage, displaying the fraction of genes with detected protein peptides  
 109 as a function of RNA abundance (mRNA transcripts per million reads). **(C)** Genome-wide correlation  
 110 between the aggregate RNA and protein abundance for 10,672 protein-coding genes (showing average  
 111 expression across 202 lines). All proteomics data can be interactively explored in the Encyclopedia of  
 112 Proteome Dynamics (<http://www.peptracker.com/epd>). **(D)** Similarity between the iPSC proteome and  
 113 somatic tissues. Shown are Spearman correlation coefficients between the average iPSC proteome  
 114 and 23 tissues from the Human Proteome Map, including Adult (Red) and Fetal (Blue) tissues  
 115 **(Methods)**.

116

## 117 RNA and proteome variability

118 Across iPSC lines, the majority of genes showed low RNA and protein coefficients of variation  
 119 **(Fig. 2A)**, with only weak to moderate global correlation across the lines **(Fig. 2B)**. Notably,  
 120 many highly variable RNAs showed low covariation with protein (985 RNA-protein pairs with  $r$

121 < 0.2), indicating that the variation in protein abundance between iPSC lines is not explained  
122 solely by variation in RNA expression levels.

123

124 Next, we assessed a range of factors, including the cell line donor, age, sex, as well as culture  
125 medium and other technical factors, for their potential contribution to the variation in protein  
126 expression between iPSC lines (**Fig. 2C; Methods**). The largest effects on protein variation  
127 were associated with donor effects and culture medium (**Fig. 2C**). Even after accounting for  
128 protein variability that can be explained by transcriptional mechanisms, i.e. where there was  
129 parallel variation in RNA expression (**Supp. Fig. 7**), substantial effects on protein expression  
130 levels were still observed for both donor and culture medium (**Fig. 2C; Methods**). This  
131 indicates that (i) differences between individual donors play an important role in causing the  
132 observed variation in proteome expression between the iPSC lines and (ii) post-transcriptional  
133 mechanisms also contribute significantly to these donor effects.

134

135 We note that some of the genes showing the strongest effect of donor variation on protein  
136 expression levels encoded the same proteins that were previously identified as being  
137 differentially expressed between reprogrammed iPS cells and embryonic stem cells (ESCs)  
138 <sup>18,19</sup>. These earlier studies had suggested that reprogrammed iPS cells may have important  
139 differences in protein expression, when compared with the physiological stem cells present in  
140 embryos. However, these previous comparisons of iPSC and ESC cells did not control for  
141 genetic differences between donors. Our data show that these previously reported differences  
142 between iPSC and ESC cells may be explained by underlying effects of genetic variation  
143 between donors, rather than intrinsic differences between the iPSC and ESC cell types (**Supp.**  
144 **Fig. 6**). This supports the view that it is possible to reprogram iPS cells to a state showing  
145 near identical protein expression patterns to ESC cells.

## 146 Coordinated expression changes of biological processes

147 Next, we explored protein co-expression clusters (**Methods**), which identified 51 modules of  
148 proteins that showed patterns of co-expression, 34 of which were enriched for at least 10 GO  
149 terms (FDR<10%; Fisher's exact test; **Supp. Table 5**). Among the most prevalent processes  
150 identified were 'cellular developmental process' (3 modules), 'cell adhesion' (3 modules), and  
151 'respiratory electron transport chain' (3 modules). For each module we evaluated: (i) the  
152 coefficients of protein abundance variation (CV), (ii) the fraction of variance explained by  
153 biological and technical factors (**Methods**), and (iii) the RNA-protein correlation. While  
154 modules with high protein variability also tended to show high RNA variability, (**Fig. 2D,E**;

155 **Supp. Fig. 8**), we also identified clusters showing high variability at the protein level, but not  
156 at the RNA level (**Fig. 2D**).

157

158 There were differences between modules with high RNA and protein variability (e.g. clusters  
159 1, 2, 3), both in the specific enriched GO terms and in their variance components (**Fig. 2D,E**).  
160 For example, Cluster 2 was enriched for proteins encoded on the X chromosome and variation  
161 was associated with the sex of the donor, at both the RNA and protein levels. In contrast,  
162 Cluster 4 showed high variability in protein abundance, but low RNA variability (**Fig. 2E**). The  
163 134 proteins in Cluster 4 were enriched for integral membrane proteins and their variation was  
164 linked to the culture medium variance component (**Fig. 2E**), which was not explained by biases  
165 in the quantification of peptides from membrane proteins (**Supp. Fig. 5**). This indicates that  
166 differences in the cellular environment can affect the abundance of Cluster 4 proteins, and is  
167 not driven by changes in transcriptional regulation.

168

169 In summary, analysis across the 202 iPSC lines shows significant donor-to-donor variation in  
170 both the proteome and transcriptome. Interestingly, donor variation was apparent both at the  
171 level of individual proteins and in the coordinated regulation of whole pathways.

172

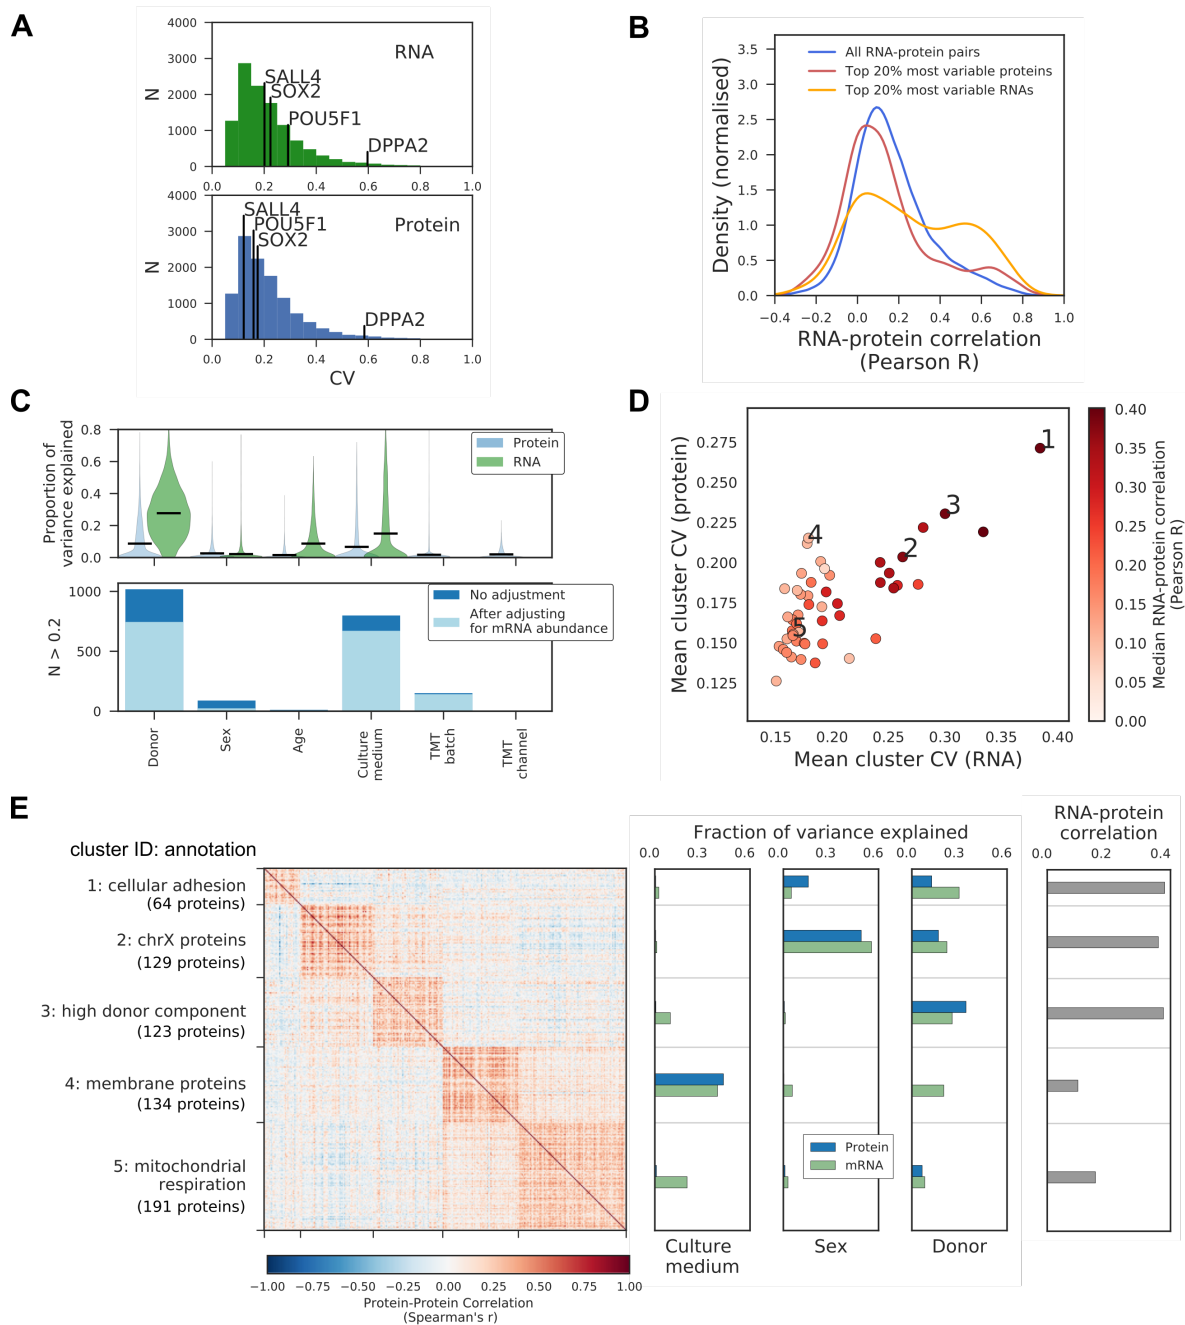

173

174

175

176

177

178

179

180

181

182

183

184

185

186

**Figure 2 | Genetic and non-genetic sources of iPS proteome variation. (A)** Distribution of RNA and protein coefficients of variation for individual protein coding genes across lines. **(B)** Distribution of RNA-protein correlation coefficients for individual genes across lines (pearson r). Shown are densities for all genes or when selecting the top 20% variable RNA or protein. **(C)** Quantified variance components of individual RNA and protein, considering different technical and biological factors. Shown is the distribution of variance contributions of different factors (upper panel), and numbers of proteins with greater than 20% explained variance for each factor (lower panel). Also shown are the number of proteins that retain greater than 20% contribution for each factor when accounting for RNA variation (light blue; see **Methods**). **(D)** Median variability and RNA-protein correlations (Spearman r) across 51 protein co-expression modules. Specific modules of interest are labelled (1-5). **(E)** Left: Coexpression heatmap for proteins in modules labelled in **D**, displaying pairwise correlation coefficients between proteins (**Supp. Table 17**). Right: Variants components for the median protein and RNA levels of each module, as well as pairwise correlation (Pearson r).



## 187 Mapping *cis* genetic effects on protein abundance

188 Next, we mapped *cis* quantitative trait loci at both the RNA and protein levels (on autosomes;  
189 MAF>5%; within +/- 250 kb around the gene; using a linear mixed model; **Methods**). The  
190 number of pQTLs identified was greatly increased by adapting PEER adjustment to account  
191 for non-genetic sources of variation previously developed for mapping of RNA<sup>20</sup> to protein  
192 traits (**Methods**; **Supp. Fig. 10**). Proteomic QTL analysis identified 712 genes with a pQTL  
193 (FDR<10%; 10,675 proteins tested corresponding to 9,564 genes), compared to 5,744 genes  
194 with an eQTL when considering RNA levels (14,148 protein-coding and non-coding genes  
195 tested; 3,641 genes tested at both protein and RNA level; **Fig. 3A**; **Supp. Table 7,8,9**).

196  
197 To investigate which DNA sequence variants affected both protein and RNA expression levels,  
198 we assessed the 'replication' of pQTLs at the RNA level and vice versa (nominal significance  
199 at P<0.01 and same direction of effects; **Methods**). This revealed 478 pQTLs (69%) that were  
200 also detected at the RNA level. Conversely, analysis of 3,641 protein-coding eQTL genes with  
201 protein expression identified 897 eQTLs (25%) that were also detected at the protein level.  
202 Globally, eQTL and pQTL effect sizes were moderately correlated (**Supp. Fig. 11**). An  
203 example of an eQTL with a corresponding effect at the protein level is the lead eQTL variant  
204 rs1129187 for the *PEX6* gene (**Fig. 3B**), a known risk variant for Alzheimer's disease in APOE  
205 e4+ carriers<sup>21</sup>.

206  
207 Next, we used multivariate logistic regression to systematically characterize the technical and  
208 biological determinants affecting whether eQTLs result in detectable protein changes (**Fig.**  
209 **3C**). This identified the eQTL effect size as the most relevant positive factor, followed by the  
210 protein coefficient of variation and the average protein abundance (**Fig. 3C**; **Supp. Table 12,**  
211 **13**). eQTLs for genes that are the subunits of protein complexes were less frequently  
212 detectable at the protein level. Notable examples include subunits of the mitochondrial  
213 ribosome and of the spliceosome, for which the eQTLs, while having highly significant effects  
214 at the RNA level, were buffered at the protein level (**Supp. Table 14**). This indicates that *cis*  
215 regulatory genetic effects on protein abundance in iPSCs can be tempered by post-  
216 transcriptional mechanisms dependent on protein-protein interactions. For comparison, we  
217 also considered technical sources of variation at the protein level (coefficient of error), which  
218 were markedly less relevant than biological factors. Therefore, we propose that the observed  
219 buffering of eQTLs at the protein level primarily arises from a combination of biological factors,  
220 rather than technical limitations in protein quantification.

221

222

223

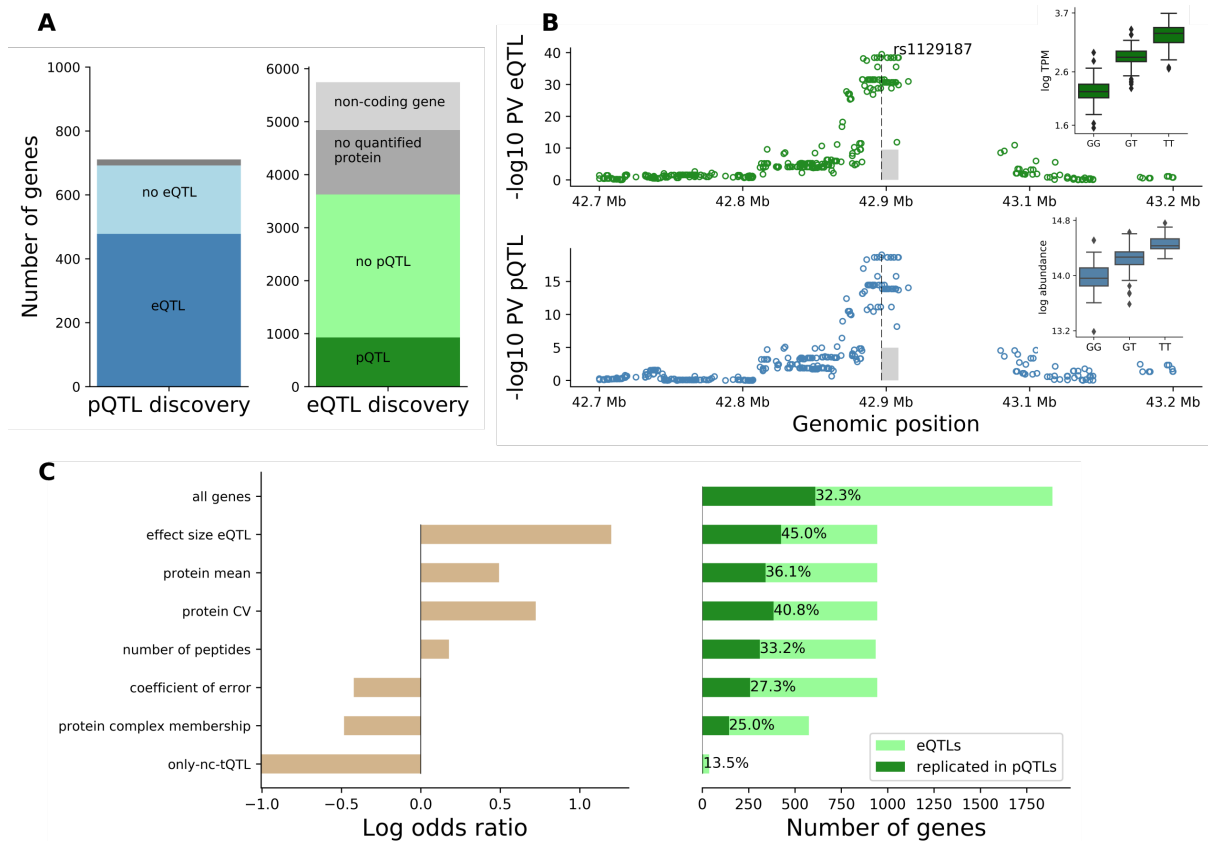

224

225

226 **Figure 3 | human iPSC cis protein and RNA QTLs.** (A) Number of genes with a protein (blue) or RNA  
 227 (green) QTL (FDR<10%) and replicated effects across molecular layers. Left: Number of pQTL genes,  
 228 either with (dark blue) or without (light blue) replicated RNA effect. Right: Number of eQTL genes,  
 229 either with (dark green) or without (light green) replicated protein effect. Replication defined at nominal P<0.01  
 230 with consistent effect direction. Grey fractions correspond to genes that could not be assessed at the  
 231 other molecular layer (dark grey: not expressed, light grey: non-coding eQTL genes). (B) Manhattan  
 232 plots for cis RNA (top) and protein (bottom) QTL mapping for *PEX6*. Boxplots show RNA and protein  
 233 expression for different alleles at the eQTL lead variant rs1129187. (C) Logistic regression model  
 234 trained on the replication status of eQTL at the protein level (defined as in A) considering technical and  
 235 biological covariates (trained on 1,887 genes detected at protein and RNA level in all 202 lines;  
 236 **Methods**). Left: Log odds ratio of individual covariates considered in the model. Right: Fraction of  
 237 eQTLs with replicated protein effects, considering different gene strata. All genes correspond to no  
 238 stratification. Considered covariates are: are eQTL effect size, average protein abundance, protein  
 239 coefficient of variation across lines, number of identified protein peptides, protein technical coefficient  
 240 of variation, membership in protein complexes, and whether the eQTL variant is associated with  
 241 changes in expression of at least one coding transcript isoforms (only-nc-tQTLs). Percentages denote  
 242 the replication rate.

243

244

245

246

247 Isoforms affect eQTLs acting at the protein level

248 Next, we investigated the utility of RNA and protein quantification with isoform resolution to  
249 explain which eQTLs manifest in detectable protein effects. For this analysis we considered  
250 54,965 transcript isoforms (quantified using Salmon<sup>22</sup>) and 126,758 peptides for QTL  
251 mapping, which identified 5,734 genes with a transcript QTL and 740 genes with a peptide  
252 QTL (**Supp. Fig. 13, Methods, Supp. Table 4,10,11**). Overlaying the iPSC transcript QTLs  
253 with gene-level eQTLs identified 84 eQTLs that were exclusively associated with abundance  
254 changes of a non-protein coding transcript isoform (nominal  $P < 0.01$ ). QTL analysis with  
255 transcript isoform resolution thus explains why some of the eQTLs identified by conventional  
256 RNA analysis cannot give rise to protein QTLs (**Fig. 3C**). For example, rs2709373, an eQTL  
257 variant for *METTL21A*, was associated specifically with the abundance of the non-coding  
258 transcript isoform ENST00000477919, without any detectable effect on the abundance of any  
259 protein-coding transcript isoforms and thus did not alter protein expression levels from this  
260 locus (**Fig. 4A**).

261

262 The transcript QTLs also provided insights into why some pQTLs were not detected as eQTLs.  
263 Out of 234 pQTLs for which no corresponding eQTL was found, we identified 66 pQTLs with  
264 a significant transcript QTL (**Supp. Fig. 13**). Interestingly, for 16 of these genes, including  
265 *MMAB* (**Fig. 3C**), we observed genetic effects with opposite directions on coding and non-  
266 coding transcript isoforms. These data show that the accurate mapping of RNA-level eQTLs  
267 can be confounded for loci that give rise to multiple transcript isoforms. In particular, transcript  
268 isoforms from the same gene may be differently affected by the same DNA variant, while only  
269 a subset of the transcripts may contribute to protein expression from the locus.

270

271 Finally, we used the peptide-level QTL information to explore, at higher resolution, isoform-  
272 specific transcript QTLs. We identified 53 genes with transcript QTLs that were not detected  
273 at either gene resolution RNA or protein levels (i.e. no eQTL or pQTL), but which were  
274 detectable as a peptide QTL. One example is the gene *CTTN* (**Fig. 4C**), where an increase in  
275 the expression of one transcript isoform was accompanied by a decrease in the expression of  
276 a second isoform. At the protein level, the same variant exerted a detectable effect on a  
277 peptide sequence that uniquely maps to the first transcript isoform.

278

279 Taken together, our results illustrate a variety of different RNA-protein relationships, and how  
280 they are affected by genetic variation between donors. These results show important roles of  
281 transcriptional regulation underlying *cis* pQTL effects, highlight mechanisms explaining the  
282 differences in observed genetic effects, and in particular show that isoform-specific effects,  
283 invisible to standard eQTL mapping approaches, can be detected at the protein level.

284

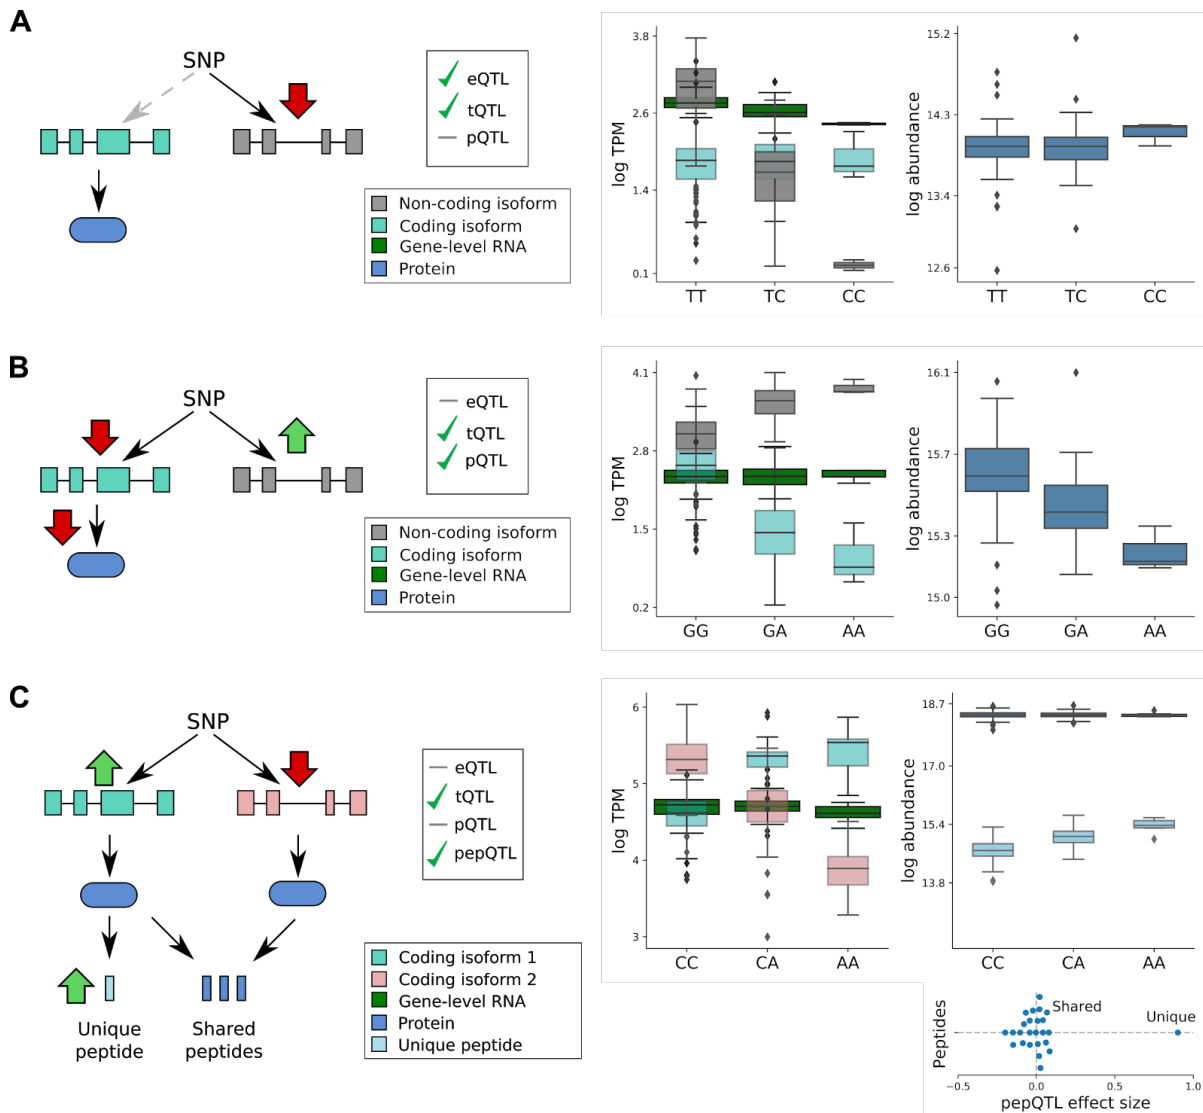

285

286

287 **Figure 4 | Isoform-resolution analysis of RNA and protein QTLs.** (A) eQTL with no detectable  
 288 protein effect (rs2709373; gene *METTL21A*), which can be explained by an underlying transcript QTL  
 289 acting on the non-coding isoform ENST00000477919 (grey). No genetic effect is observed on the  
 290 protein-coding isoform ENST00000425132 (light blue), and consequently no protein effect. (B) pQTL  
 291 without RNA replication (rs6606721; gene *MMAB*), with a directional opposite effect on a coding and a  
 292 noncoding isoform (light blue: ENST00000540016; grey: ENST00000537496), resulting in no overall  
 293 change in gene expression level. (C) Transcript QTL that is neither an eQTL nor a pQTL. The variant  
 294 rs12795503 has opposite directional effects on the two coding transcripts ENST00000301843 (light  
 295 blue) and ENST00000346329 (light red), resulting in no detectable effects on either the RNA or protein  
 296 level. The transcript-specific effect on ENST00000301843 is detectable for the peptide  
 297 QDSAAGFDYK (uniquely mapping to exon 11 of ENST00000301843), while no effect is observed for  
 298 peptides shared by both protein isoforms. **Subplot** shows genetic effect sizes for all peptides mapped  
 299 to *CTTN*. Shared: peptides mapping to isoforms 1 and 2; Unique: peptide uniquely mapping to isoform  
 300 1.

301

302

### 303 *trans* protein effects of *cis* QTLs

304 We extended our analysis to map proteome-wide associations, considering variants with  
305 either significant *cis* RNA, or *cis* protein, QTLs (**Fig. 5A**). Overall, our data show that *cis* pQTLs  
306 have *trans* effects on protein levels more frequently than eQTLs without a corresponding *cis*  
307 pQTL (**Fig. 5B**, see **Methods**). Genome-wide we identified 89 *cis*-pQTL lead variants with  
308 *trans* effects on 173 genes (FDR<10%; **Supp. Table 15**).

309

310 We observed that groups of proteins detected with ‘shared genetic regulation’, defined here  
311 as proteins whose abundance is affected, either in *cis*, or *trans*, by the same genetic variant,  
312 were enriched for protein complex subunits (odds ratio=15,  $P=1.24 \cdot 10^{-14}$ , Fisher’s exact test;  
313 **Fig. 5C**). The *cis* and *trans* effects showed similar effect directions and effect sizes, consistent  
314 with genetic effects mediated via stabilising protein-protein interactions (**Fig. 5D**). This  
315 hypothesis is supported by previous studies showing that protein modules sharing genetic  
316 effects in *trans* are enriched in protein interactions<sup>23</sup>, that somatic aberrations in human cancer  
317 cell lines are propagated in *trans*<sup>10,11</sup>, and by the enhanced co-expression of protein complex  
318 subunits and the significant donor variance component observed for many protein complexes  
319 (**Fig. 5E**; **Supp. Fig. 9**).

320

321 For several protein complexes, we observed that *cis* genetic regulation of one subunit may  
322 lead to *trans* genetic regulation of other subunits (**Supp. Table 16**). This is illustrated by  
323 PEX26-PEX6-PEX1, a protein complex involved in peroxisome biogenesis (**Fig. 5F**). A strong  
324 association was detected between all complex subunits and the PEX6 *cis* eQTL rs1129187  
325 (**Fig. 3B**). This suggests that PEX6 acts as a limiting subunit of this complex in iPSCs. As  
326 noted above, this SNP is a known risk variant for Alzheimer’s disease in APOE e4+ carriers<sup>21</sup>.  
327 Thus, our results suggest a biological mechanism underlying this risk variant, namely through  
328 changes in the abundance of the PEX26-PEX6-PEX1 complex. This is in line with the  
329 proposed roles of peroxisomal function in the development of Alzheimer’s disease<sup>24</sup>.

330

331 Several variants also showed genetic effects of opposite directions in *cis* and *trans*. For  
332 example, rs1326138, the *cis* pQTL for SUCLA2, had opposite effects in *trans* on SUCLG2.  
333 These proteins are mutually exclusive binding partners of SUCLG1, with which they form the  
334 succinate coenzyme A ligase complex. A possible mechanism for this genetic effect is that an

335 increase in SUCLA2 reduces the availability of SUCLG1 to dimerise with SUCLG2, leaving  
 336 the latter in a monomeric state where it is prone to protein degradation (**Supp. Fig. 14**).

337 **Figure 5 | *trans* effects on the iPS proteome.** (A) Targeted strategy for mapping *trans* genetic effect  
 338 on protein abundance. Lead *cis* eQTL or pQTL variants are considered for proteome-wide association  
 339 analysis. (B) QQ-plot of negative log P values from *trans* pQTL analysis, either considering 712 lead

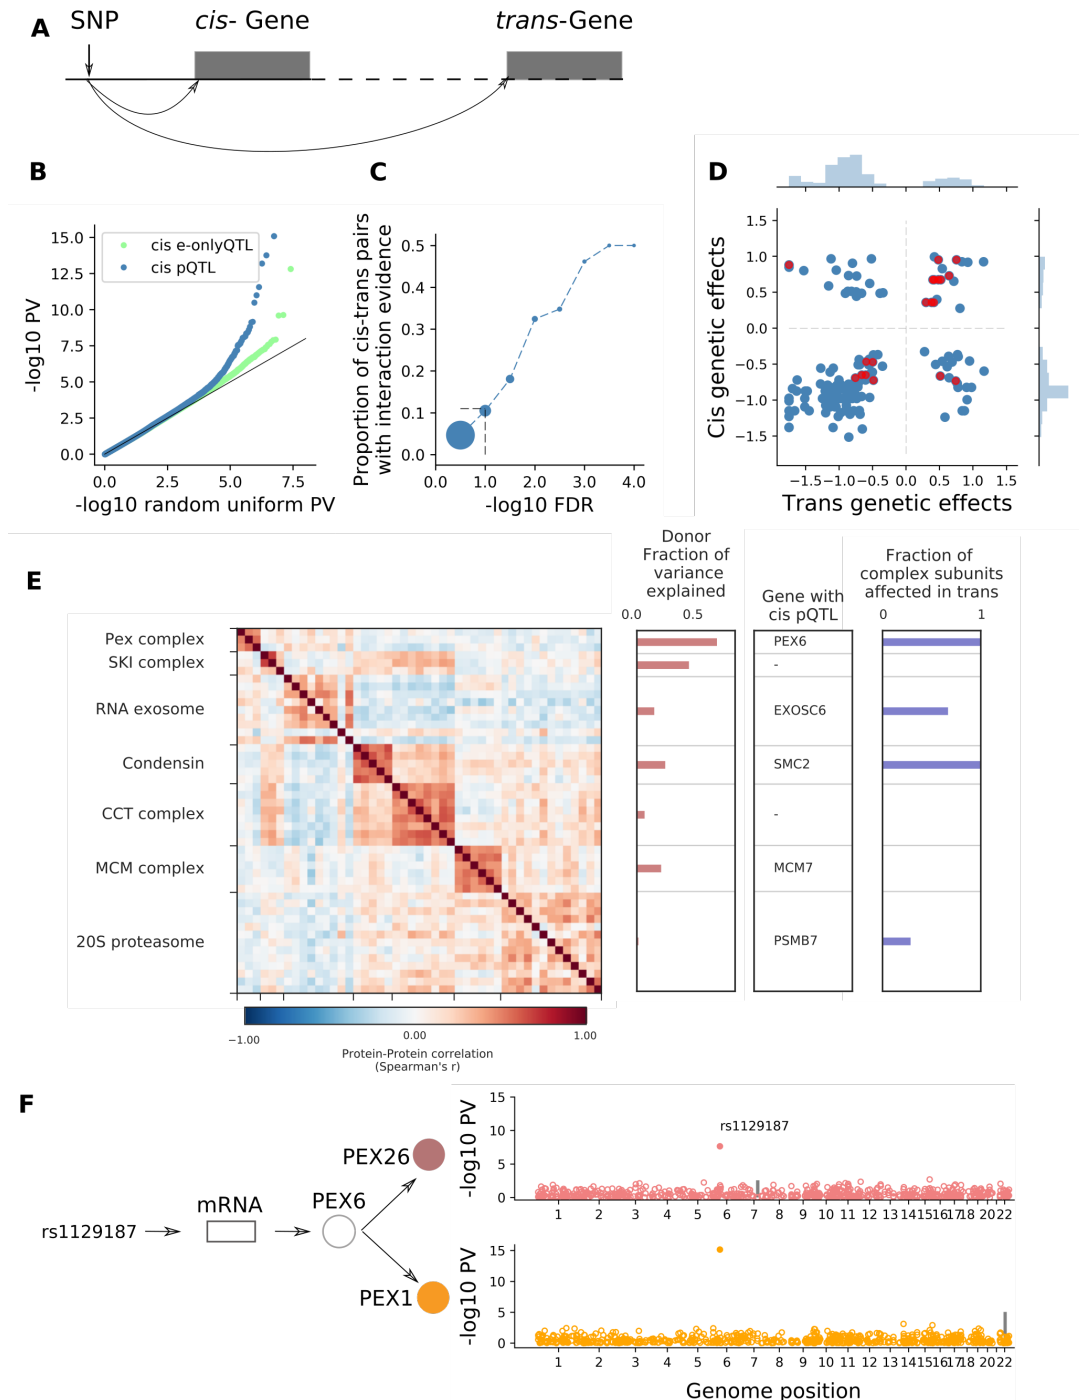

340 *cis* pQTL variants (blue) or 2,744 lead eQTL variants without replicated pQTL effect (defined as in Fig.  
 341 3A; light green) for proteome-wide association analysis. (C) Enrichment of protein-protein interactions  
 342 among significant *trans* pQTLs. Shown is the fraction of *cis-trans* gene pairs linked by a *trans* pQTL  
 343 with evidence of protein-protein interactions (based on the union of CORUM, IntAct, and StringDB), for  
 344 different *trans* pQTL discovery FDR thresholds. Dot size is proportional to the number of protein pairs.  
 345 Vertical line corresponds to *trans* pQTL FDR<10%. (D) Juxtaposition of genetic effect sizes for protein

346 pairs that are regulated in *cis* and *trans* by the same variant (FDR<0.1). Red points indicate protein  
347 pairs with evidence for protein-protein interactions as defined in **C**. **(E)** Left: Protein coexpression of  
348 selected protein complex subunits defined based on CORUM, displaying pairwise Spearman correlation  
349 coefficients between proteins. Right: i) fraction of the average cluster protein expression level explained  
350 by donor effects; ii) subunit with the most significant *cis* pQTL; iii) fraction of subunits in association with  
351 the *cis* pQTL at nominal significance (P<0.01). **(F)** The PEX26-PEX6-PEX1 complex. The variant  
352 rs1129187 is associated in *cis* with changes in the RNA and protein abundance of PEX6 and in *trans*  
353 with changes in the protein abundance of PEX1 and PEX26.  
354

## 355 QTLs with protein level protein level effects are enriched for 356 human disease variants

357 To explore the functional physiological relevance of iPSC pQTLs, we tested for overlap with  
358 disease-linked variants identified in genome-wide association studies (GWAS). To do this, we  
359 queried QTLs that tag known GWAS variants<sup>25</sup> (i.e. are in LD  $r^2>0.8$ ; **Methods**), identifying  
360 10% of pQTLs and 7% of eQTLs, respectively, that tag a GWAS disease variant. This  
361 corresponds to an enrichment of 1.93-fold for pQTLs and 1.36-fold for eQTLs, over a matched  
362 set of random control QTL variants (**Fig. 6A**). The data show that QTLs affecting both RNA  
363 and protein expression levels are more likely to tag a disease variant, compared with either  
364 eQTL corresponding to non-protein coding genes, or eQTL that do not result in a detectable  
365 protein effect (**Fig. 6B**). Notably, these differences could not be explained by differences in  
366 the number of eQTL and pQTL discoveries (**Supp. Fig. 15**).

367  
368 Of note, 19 of the pQTLs without a detectable effect at the RNA level tag GWAS variants  
369 (**Supp. Table 7**). One such example is the *cis* pQTL of VRK2, rs1051061 (**Supp. Fig. 17**), a  
370 missense variant within the kinase domain of VRK2, which is associated with schizophrenia  
371 risk<sup>26</sup>. VRK2, a serine/threonine kinase, is known to be down-regulated in several neurological  
372 disorders, including schizophrenia<sup>27,28</sup>. We hypothesise that, independently of expression  
373 changes, the alternative allele of rs1051061 affects the protein structure and its capacity to  
374 bind, leaving the protein in an unstable state. This result contributes to the understanding of  
375 schizophrenia's aetiology, supporting an important role for VRK2 and suggesting possible  
376 disease onset already in early development stages, i.e in pluripotent cells.

377  
378 In summary, our data strongly support the conclusion that analysis of pQTLs provides unique  
379 information regarding the functioning of disease risk variants and give insights, which are not  
380 identifiable using eQTL mapping, into mechanisms through which genetic effects modulate  
381 cell physiology.

382

383

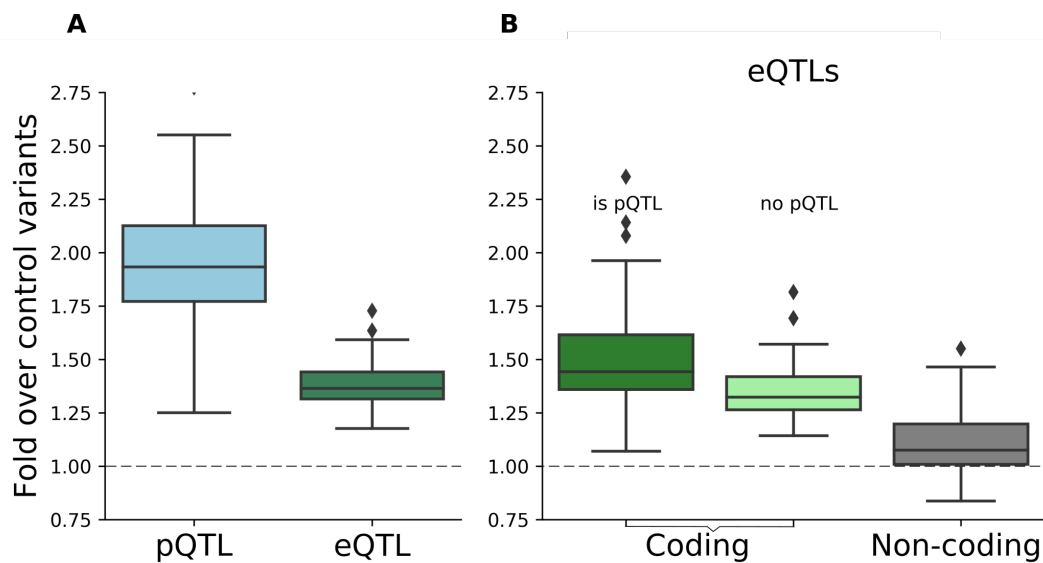

384

385

386 **Figure 6. Enrichment of disease variant tagging different RNA and protein QTLs** (A) Fold GWAS  
387 tagging enrichment over control variants for pQTLs (blue) and eQTLs (green) corresponding to protein  
388 coding genes. (B) Fold enrichment for eQTLs corresponding to protein-coding genes either with (dark  
389 green) or without (light green) replicated effects at the protein level, and for eQTLs that affect non-  
390 coding genes (grey).

391

## 392 Discussion

393 We have performed the first in-depth characterisation of gene expression and the human iPSC  
394 proteome, and, to our knowledge, provided the largest dataset with parallel RNA/protein  
395 profiling in human cells. By quantifying protein and transcript expression variation across more  
396 than 200 human iPSC lines, we identified genetic and non-genetic mechanisms underlying  
397 variation at both the protein and RNA levels. We have mapped more than 700 protein  
398 Quantitative Trait Loci (pQTLs) and analysed in detail how these relate to eQTLs. While  
399 previous studies have established overlap and colocalization of eQTL and disease-linked  
400 GWAS associations<sup>29</sup>, a key finding from this study is that the subset of QTLs with an effect  
401 at the protein level were significantly more likely to be associated to disease traits. These  
402 results demonstrate the importance of the systematic identification of mechanisms through  
403 which genetic variation can affect cell physiology and disease.

404

405 We have identified the specific proteins that show most variation in abundance between iPSC  
406 lines. These are often co-expressed in groups of proteins with shared biological functions.  
407 Thus, the major variation is seen with proteins affecting processes such as cell differentiation



408 and cell-cell adhesion. Importantly, we detected many proteins that varied in abundance  
409 without a parallel variation in the abundance of their cognate RNAs. These observations  
410 indicate an important role for post-transcriptional mechanisms in contributing to genetic  
411 variation in the human population and identify genes whose important roles are invisible in  
412 transcript mapping studies.

413

414 Our data identified that donor-specific genetic factors were major contributors to the  
415 differences in protein expression detected across the iPSC lines. Another major factor was  
416 the cell culture conditions, indicating that protein expression in iPSCs is sensitive to the cellular  
417 growth environment. Consistent with the significant influence of donor genetics on variation in  
418 protein expression, we mapped 712 common genetic variants associated with changes in  
419 protein abundance. By the systematic comparison of matched protein and RNA data, including  
420 detailed resolution of separate isoforms, we identified that in *cis*, DNA variants act mainly  
421 through transcriptional mechanisms. This involves the variant either modulating total transcript  
422 abundance, or, in some cases, varying the proportions of different transcript isoforms  
423 produced from the locus. This extends previous results on the strong overlap between *cis*  
424 eQTLs and pQTLs<sup>7</sup>.

425

426 Our data also illustrate the ability of protein-protein interactions to both buffer and propagate  
427 genetic effects. A long-standing hypothesis has been that many protein complexes have a  
428 rate-limiting subunit that determines complex abundance, with any excess subunits being  
429 rapidly degraded (e.g. because of exposure of hydrophobic residues). This has two  
430 implications. First, *cis* eQTLs for non-rate-limiting subunits should have minimal effect at the  
431 protein level, since the abundance of these proteins is determined by the abundance of the  
432 whole complex. Second, *cis* eQTLs for rate-limiting subunits should have effects in *trans* on  
433 the abundance of the whole complex, and on most, if not all, subunits therein. We found  
434 evidence for both phenomena in our analysis of *cis* and *trans* pQTLs. These observations, the  
435 first to our knowledge for common genetic variants in human, are consistent with previous  
436 results obtained on high heterozygosity samples, i.e. outbred mice<sup>23</sup>, and somatic aberrations  
437 in human cancer cell lines<sup>10,11</sup>.

438

439 Understanding the mechanisms through which genetic variations act in the human population  
440 is of great relevance to characterising risk factors and susceptibility to disease. There is  
441 growing interest in the potential for studying disease mechanisms using disease relevant  
442 tissues that are derived from panels of iPSCs<sup>30-33</sup>. Our study provides important information  
443 for advancing such studies on the genetic regulation of protein expression and disease-  
444 relevant phenotypes in iPSC-derived model systems.

445

#### 446 **Author contributions**

447 DS, BM, AL, OS: Wrote the paper with input from all authors.

448 DS, BM, AB, HK, MB: Contributed to the bioinformatic analysis

449 DB: Generated the proteomics data

450 MB: Curated and processed the RNA data

451 AB, BM, DB: Curated and processed proteomics data

452 DS: Analysed the data - variance component analysis

453 BM: Analysed the data - QTL analysis

454 DS, MB, BM: Designed the QTL mapping workflow

455 AL, OS: Supervised and designed the research.

456

#### 457 **Acknowledgements**

458 This work was funded with a strategic award from the Wellcome Trust and Medical  
459 Research Council (WT098503). The authors thank our colleagues, including Pedro Beltrao,  
460 Doreen Cantrell, Jason Swedlow and Greg Findlay, for comments on the manuscript.

461

## 462 **Methods**

### 463 **RNA-seq data processing**

464 Raw RNA-seq data for 331 samples were obtained from the ENA project: ERP007111. CRAM  
465 files were merged on a sample level and were converted to FASTQ format. The reads were  
466 trimmed to remove adapters and low quality bases (using Trim Galore!<sup>34</sup>), followed by read  
467 alignment using STAR (version: 020201)<sup>35</sup>, using the two-pass alignment mode and the  
468 default parameters as proposed by ENCODE (c.f. STAR manual). All alignments were relative  
469 to the GRCh37 reference genome, using ENSEMBL 75 as transcript annotation<sup>36</sup>.

470 Samples with low quality RNA-seq were discarded, if they had less than 2 billion bases  
471 aligned, had less than 30% coding bases, or had a duplication rate higher than 75% were.  
472 This resulted in 323 lines for analysis, for 202 of which matched proteome data was available.

473

474 Gene-level RNA expression was quantified from the STAR alignments using featureCounts  
475 (v1.6.0)<sup>37</sup>, which was applied to the primary alignments using the “-B” and “-C” options in  
476 stranded mode, using the ENSEMBL 75 GTF file. Quantifications per sample were merged  
477 into an expression table using the following normalization steps. First, gene counts were

478 normalized by gene length. Second, the counts for each sample were normalized by  
479 sequencing depth using the edgeR adjustment<sup>38</sup>.

480 Transcript isoform expression was quantified directly from the (unaligned) trimmed reads  
481 using Salmon<sup>22</sup> (version: 0.8.2), using the "--seqBias", "--gcBias" and "VBOpt" options in "ISR"  
482 mode to match our inward stranded sequencing reads. The transcript database was built on  
483 transcripts derived from ENSEMBL 75. The TPM values as returned by Salmon were  
484 combined into an expression table

## 485 Quantitative proteomics data generation

486 All lines included in this study are part of the HipSci resource and were reprogrammed from  
487 primary fibroblasts as previously described<sup>1</sup>. We selected 217 lines for in depth proteomic  
488 analysis with Tandem Mass Tag Mass Spectrometry. A subset of 202 lines (112 normal and  
489 90 disease; **Supp. Table 1**) with matched mRNA and protein data were considered for further  
490 analysis.

### 491 Sample preparation

492 For protein extraction, frozen iPSC cell pellets were washed with ice cold PBS and redissolved  
493 immediately in 200  $\mu$ L of lysis buffer (8 M urea in 100 mM triethyl ammonium bicarbonate  
494 (TEAB) and mixed at room temperature for 15 minutes. DNA in the cell lysates was sheared  
495 using ultrasonication (6 X 20 s at 10°C). The proteins were reduced using tris-  
496 carboxyethylphosphine TCEP (25 mM) for 30 minutes at room temperature, then alkylated in  
497 the dark for 30 minutes using iodoacetamide (50 mM). Total protein was quantified using the  
498 fluorescence based EZQ assay (Life Technologies). The lysates were diluted 4-fold with 100  
499 mM TEAB for the first protease digestion with mass spectrometry grade lysyl endopeptidase,  
500 Lys-C (Wako, Japan), then diluted a further 2.5-fold before a second digestion with trypsin.  
501 Lys-C and trypsin were used at an enzyme to substrate ratio of 1:50 (w/w). The digestions  
502 were carried out for 12 hours at 37°C, then stopped by acidification with trifluoroacetic acid  
503 (TFA) to a final concentration of 1% (v:v). Peptides were desalted using C18 Sep-Pak  
504 cartridges (Waters) following manufacturer's instructions and dried.

### 505 Tandem Mass Tag Mass Spectrometry analysis

506 For Tandem Mass Tag (TMT)-based quantification, the dried peptides were redissolved in  
507 100mM TEAB (50  $\mu$ L) and their concentration was measured using a fluorescent assay  
508 (CBQCA) (Life Technologies). 100  $\mu$ g of peptides, from each cell line to be compared, in 100  
509  $\mu$ L of TEAB were labelled with a different TMT tag (20  $\mu$ g ml<sup>-1</sup> in 40  $\mu$ L acetonitrile) (Thermo

510 Scientific), for two hours at room temperature. After incubation, the labelling reaction was  
511 quenched using 8  $\mu$ l of 5% hydroxylamine (Pierce) for 30 minutes and the different cell  
512 lines/tags were mixed and dried in vacuo. TMT-ten plex was used to label ten iPSC lines and  
513 quantify them in parallel. In total 24 TMT-ten plex experiments were performed, where one  
514 iPSC line (bubh\_3) was chosen as a reference cell line and was kept constant in all TMT  
515 batches. The other nine quantification channels were used to label 9 different cell lines.

516 The TMT samples were fractionated using off-line high pH reverse phase chromatography:  
517 samples were loaded onto a 4.6 x 250 mm Xbridge™ BEH130 C18 column with 3.5  $\mu$ m  
518 particles (Waters). Using a Dionex bioRS system, the samples were separated using a 25-  
519 minute multistep gradient of solvents A (10 mM formate at pH 9) and B (10 mM ammonium  
520 formate pH 9 in 80% acetonitrile), at a flow rate of 1 ml/min. Peptides were separated into 48  
521 fractions, which were consolidated into 24 fractions. The fractions were subsequently dried  
522 and the peptides redissolved in 5% formic acid and analysed by LC-MS.

523 5% of the material was analysed using an orbitrap fusion tribrid mass spectrometer (Thermo  
524 Scientific), equipped with a Dionex ultra high-pressure liquid chromatography system (nano  
525 RSLC). RP-LC was performed using a Dionex RSLC nano HPLC (Thermo Scientific).  
526 Peptides were injected onto a 75  $\mu$ m x 2 cm PepMap-C18 pre-column and resolved on a 75  
527  $\mu$ m x 50 cm RP- C18 EASY-Spray temperature controlled integrated column-emitter  
528 (Thermo), using a four-hour multistep gradient from 5% B to 35% B with a constant flow of  
529 200 nL min<sup>-1</sup>. The mobile phases were: 2% ACN incorporating 0.1% FA (Solvent A) and 80%  
530 ACN incorporating 0.1% FA (Solvent B). The spray was initiated by applying 2.5 kV to the  
531 EASY-Spray emitter and the data were acquired under the control of Xcalibur software in a  
532 data dependent mode using top speed and 4 s duration per cycle. The survey scan is acquired  
533 in the orbitrap covering the *m/z* range from 400 to 1400 Th, with a mass resolution of 120,000  
534 and an automatic gain control (AGC) target of 2.0 e5 ions. The most intense ions were  
535 selected for fragmentation using CID in the ion trap with 30 % CID collision energy and an  
536 isolation window of 1.6 Th. The AGC target was set to 1.0 e4 with a maximum injection time  
537 of 70 ms and a dynamic exclusion of 80 s.

538 During the MS3 analysis for more accurate TMT quantifications, 5 fragment ions were co-  
539 isolated using synchronous precursor selection using a window of 2 Th and further fragmented  
540 using HCD collision energy of 55%<sup>39</sup> The fragments were then analysed in the orbitrap with  
541 a resolution of 60,000. The AGC target was set to 1.0 e5 and the maximum injection time was  
542 set to 105 ms.

## 543 Proteomics data processing

544 The TMT labeled samples (24 batches of TMT-ten plex) were analysed using MaxQuant v.  
545 1.6.0.13<sup>40,41</sup>. Proteins and peptides were identified using the UniProt *human* reference  
546 proteome database (Swiss Prot + TrEMBL) release-2017\_03, using the Andromeda search  
547 engine. Run parameters and the raw MaxQuant output have been deposited at PRIDE  
548 (PXD010557).

549 The following search parameters were used: reporter ion quantification, mass deviation of 6  
550 ppm on the precursor and 0.5 Da on the fragment ions; Tryp/P for enzyme specificity; up to  
551 two missed cleavages, “match between runs”, “iBAQ”. Carbamidomethylation on cysteine was  
552 set as a fixed modification. Oxidation on methionine; pyro-glu conversion of N-terminal Gln,  
553 deamidation of asparagine and glutamine and acetylation at the protein N-terminus were set  
554 as variable modifications<sup>40-42</sup>.

555 Peptides and protein groups were identified at a False Discovery Rate (FDR) of 5%. The same  
556 FDR was applied to the Post-Translational Modifications (PTM) Site and the Peptide Spectrum  
557 Matches (PSM). We performed the FDR calculation on an extended set and removed the  
558 Razor Protein FDR calculation constrain (for more details see reference<sup>43</sup>). In total we  
559 identified 255,015 peptides detected in at least one sample (after removing reverse and  
560 contaminant peptides; on the 217 lines and 23 replicates of the reference line), which  
561 corresponds to 16,773 protein groups.

### 562 Quality control and quantification

563 To rule out technical confounding when performing genetic analyses of protein traits, we  
564 discarded 2,072 peptides that overlap a non-synonymous common variant (MAF>5% in  
565 European population) in expressed transcript (average TPM>1 based on RNA-seq). Protein  
566 group abundances were then estimated as the sum of peptide intensities mapped to a protein  
567 group. For peptide abundance we use the intensities reported in the “Peptides” file from  
568 MaxQuant.

569 We discarded 10 lines with fewer than 67,000 identified peptides (corresponding to %75 of  
570 the median number of peptides identified; **Supp. Fig. 1**), resulting in a proteomics dataset  
571 consisting of 207 lines, 202 of which had matched RNA-Seq data and hence were considered  
572 for further analysis. In addition, the technical replicates for the included reference line in each  
573 TMT batch were retained to aide the normalization of protein quantifications between batches;  
574 see below.

575 In aggregate across all lines, we detected 16,218 protein groups. For downstream analysis,  
576 we considered protein groups that were detected in at least 30 of the 202 lines and  
577 analogously considered recurrently detected peptides (**Supp. Fig. 2**), resulting in a final  
578 dataset of 11,542 recurrent protein groups and 132,716 recurrent peptides. These protein  
579 groups could be mapped to 9,993 protein coding genes.

580 To adjust for technical effects during the acquisition of protein data in TMT batches, we scaled  
581 the abundance estimate for each feature (i.e protein or peptide) as follows. For a feature and  
582 TMT batches, a scaling coefficient was computed as the ratio between the median intensity  
583 value across all lines versus the median intensity value across the subset of lines within the  
584 batch.

585 Next, we employed quantile normalization across the feature abundance distribution in each  
586 line, using a normalization reference line (selected as the line with the highest number of total  
587 peptides detected), Briefly, for each line and feature we replaced the observed expression  
588 value with the expression level in the reference line having the same rank position in the line  
589 to be normalized:  $y'_{\{p\}} = r[\text{rank } y_{\{p\}}]$ , where  $y_{\{p\}}$  are the intensity values for feature p and  
590 line l obtained after batch scaling, i.e. before normalisation,  $r$  is the sorted vector of intensities  
591 from the normalisation reference line, and  $y'_{\{p\}}$  is the normalized value.

592 Following the approach in <sup>7</sup>, we assessed quantitative compression in our proteomics data by  
593 examining changes in peptides overlapping non-synonymous variants. A non-synonymous  
594 variant in a peptide prevents detection of that peptide, as its sequence will not exist in the  
595 proteome reference. Thus, in samples heterozygous for the non-synonymous variants, the  
596 measured peptide abundance is expected to be half of that of samples homozygous for the  
597 reference variant. Our data are consistent with this expectation, indicating that compression  
598 effects are minimal in our study (**Supp Fig. 12**).

## 599 Comparisons of iPSC proteome profiles to existing tissue datasets

600 In order to compare our iPSC proteome dataset to the Human Proteome Map (HPM) <sup>15</sup> (**Fig.**  
601 **1D**), we first mapped the RefSeq IDs of proteins quantified in the HPM to UniProt IDs. We  
602 then considered the subset of 8,333 proteins with mappable IDs that were expressed in our  
603 iPSC dataset and in at least one HPM tissue. We then calculated spearman correlation  
604 coefficients between the aggregate iPSC proteome abundance profile (averaged across lines)  
605 and each HPM tissue.

## 606 RNA-protein correlations

607 For global correlations of RNA and protein abundance across all genes (**Fig 1C**), the mean  
608 abundance of each RNA and protein (using TPM and iBAQ scales, respectively) was  
609 calculated across all samples, and then the Spearman correlation across all RNA-protein  
610 pairs. For correlations of RNA and protein abundance across samples for each gene (**Fig 2B**),  
611 Pearson's correlations were calculated on the subset of samples for which both RNA and  
612 protein data were available (i.e. there no imputation or substitution of zeros for missing values  
613 in the protein data). In both cases, multi-mapping IDs between RNAs and proteins were  
614 resolved by choosing one mapping at random, dropping multi-mapping IDs from the set of  
615 protein IDs first, then from the set of gene IDs.

## 616 RNA and protein variance component analysis

617 In order to calculate the contribution of each factor  $k$  to variation in protein abundance, we  
618 fitted a random effects model:  $y = \mu + \sum_k \mu_k + \epsilon$ ;  $\mu_k \sim N(0, \sigma_k^2 \cdot M_k)$ ;  $\epsilon \sim N(0, \sigma_r^2 \cdot I)$ ;  $M_k[i, j] =$   
619  $\{1 \text{ if } f_k[i] = f_k[j]; 0 \text{ if } f_k[i] \neq f_k[j]\}$ . Here  $y$  denotes the ( $N \times 1$ ) vector of log-scaled protein  
620 abundances (or, for a coexpression cluster, the log-scaled median abundance of proteins in  
621 the cluster),  $\mu_k$  are the random effects,  $M_k$  is the ( $N \times N$ ) covariance structure,  $\sigma_k$  is the  
622 standard deviation, and  $\epsilon$  is the residual (i.i.d. noise). The random effect components are  
623 defined based on a categorical covariance function defined on covariates  $f_k$ , that is the vector  
624 of observed values for factor  $k$  (e.g.  $f_k[i] \in \{ 'male', 'female' \}$  when  $k$  is the donor sex  
625 component). We considered donor identity, donor sex, donor age, culture medium, TMT batch,  
626 and TMT channel as random effect components. In order to accurately estimate donor  
627 variance component, we restricted this analysis to the set of lines from the subset of 51 donors  
628 for which 2 cell lines were assayed. Analogous analyses were considered for RNA abundance,  
629 leaving out the TMT-specific random effects.

630 In order to account for the effects of RNA abundance on protein abundance, we also applied  
631 the variance decomposition analysis to protein abundance values after adjusting for RNA  
632 variation. Adjusted protein abundances were calculated by regressing out the effects of RNA  
633 abundance (i.e. gene-level quantifications of RNA) on protein abundance for each RNA-  
634 protein pair. To do this, we fitted a linear model between RNA and protein abundances across  
635 lines (using the Numpy function `poly1d` in Python), taking the model residuals as the adjusted  
636 protein abundance values. Variance decomposition models were then fitted as described  
637 above.

638 All variance component models were fitted using the LIMIX package<sup>44</sup>  
639 (<https://github.com/limix/limix>).

## 640 Protein co-expression and GO enrichment analysis

641 Proteins were clustered into groups based on their patterns of coexpression. Coexpression  
642 was quantified by the Spearman correlation ( $r$ ) between pairs of proteins. Clustering was  
643 performed using the affinity propagation algorithm<sup>45</sup>, as implemented in the scikit-learn python  
644 library, with the preference parameter (determining the number of clusters identified) set to -  
645 5.0 for protein, and the damping parameter set to 0.8. Median expression of each cluster in  
646 each line was calculated by mean-normalising each protein (i.e. setting mean abundance  
647 across all samples for each protein to 1), and taking the median across all proteins in each  
648 cluster in each sample. GO enrichments for each cluster were computed using the goatools  
649 package (<https://github.com/tanghaibao/goatools>), and are provided in **Supp. Table 5**.

## 650 QTL mapping of RNA and protein traits

### 651 *cis* QTL mapping

652 We used PEER<sup>20</sup> to account for unwanted variation and confounding factors both for RNA  
653 and protein traits. PEER was applied to log normalized protein abundance and log normalized  
654 gene TPM, considering the most highly expressed 10,000 proteins and genes, respectively.  
655 We selected 7 factors for protein and 13 factors for RNA, settings that were determined as the  
656 largest number of uncorrelated PEER factors identified ( $r < 0.7$ ; **Supp. Fig. 10**).

657 At protein level (protein and peptide traits), we considered the subset of lines with non-zero  
658 abundance for analysis. For RNA (gene and transcript isoform traits) all analyses are based  
659 on data from all 202 lines.

660 For *cis* genetic analyses, we considered common variants ( $MAF > 5\%$ ) in gene-proximal  
661 regions of 250k upstream and downstream of gene transcription start and end sites  
662 (GRCh37). We used a linear mixed model implemented in LIMIX<sup>44</sup>, to control for both  
663 population structure and repeat lines from the same donor using kinship as a random effect  
664 component. The population structure random effect component was estimated as the realized  
665 relationship covariance, i.e. dot product of the genotype matrices. PEER factors were included  
666 as fixed effect covariates in all analyses.

667 We used an approximate permutation scheme as in Fast QTL<sup>46</sup>, based on a parametric fit to  
668 the null distribution, to adjust for multiple testing across *cis* variants for each gene. Briefly, for



669 each gene, we obtained p-values from 100 permutations of *cis* variants. We then estimated  
670 an empirical null distribution by fitting a parametric Beta distribution to the obtained p-values.  
671 Using this null model, we estimated *cis* region adjusted p-values for QTL lead variants. For  
672 multiple testing adjustment across genes, we performed Benjamini-Hochberg adjustment.  
673 This procedure was applied to perform *cis* eQTL mapping.

674 For protein, peptide and transcript QTLs, herein features, we reported results at gene level  
675 and accounted for multiple testing across features mapping to the same gene. Subsequent to  
676 the permutation-based adjustment for individual features per gene, we applied a Bonferroni  
677 correction to the *cis* region adjusted p-values. We then identify the lead QTL variant and  
678 feature at the gene level, i.e. the combination of the most associated variant and trait (*cis*  
679 region and across features adjusted). The Benjamini-Hochberg procedure was applied on the  
680 gene level lead QTLs for adjustment across genes.

### 681 ***trans* QTL mapping**

682 *Trans* QTLs mapping was applied in a targeted manner, considering lead *cis* QTLs (712  
683 pQTLs and 2,744 eQTLs not replicated at pQTL level; FDR <10%), testing each of the 11,542  
684 recurrently expressed proteins. Genome-wide Benjamini Hochberg adjustment was  
685 performed across all tests ( $8 \cdot 10^6$  variants  $\times$  proteins for *cis* pQTLs).

686

## 687 Downstream analysis of QTL results

### 688 **QTL replication**

689 We defined a lead QTL variant as ‘replicating’ across molecular layers if it had, for the same  
690 gene, a statistically significant effect and the same direction of effect on both layers. For the  
691 replicating layer, the statistical significance is defined using the nominal p-value ( $P < 0.01$ ), or  
692 the Bonferroni corrected value ( $P < 0.01/N$ , where N is the number of features) if multiple  
693 features map to the same gene.

### 694 ***cis* eQTL and pQTL replication**

695 We trained a multivariate logistic regression model to the replication status of 1,887 genes  
696 with an eQTL for which the protein and the RNA were identified in all lines (**Supp. Table 13**).  
697 This stringent filter on the set of genes was used to mitigate effects due to differences in  
698 samples size (pQTLs tests were performed on the set of in which the protein was detected).  
699 For each RNA-protein pair, we defined 7 factors. The “protein coefficient of error” factor was  
700 computed as the coefficient of variation across the set of technical replicates (i.e. across the

701 replicate measurements of the reference sample that was included in every TMT batch). The  
702 “protein complex membership” factor was assessed using existing annotation (CORUM  
703 release May 2017; <sup>47</sup>), which was set to one if the gene encodes for the subunit of a protein  
704 complex and zero otherwise. The “only-nc-tQTLs” factor was obtained by assessing the  
705 replication of eQTLs for protein coding genes in transcript isoform QTLs (tQTLs), which was  
706 set to one if the eQTL was replicated in tQTL corresponding to a non-protein coding transcript  
707 isoform coding tQTL (but not in one corresponding to a protein coding isoform). When this  
708 assessment was not possible, or when the eQTL was replicated in at least one coding tQTL,  
709 we set the factor to 0.

710

711 We enabled comparison across factors by binarizing the values for eQTL effect size, average  
712 protein abundance, protein coefficient of variation across lines, the number of peptide  
713 identified for each protein, and protein coefficient of error. The factor was considered to be  
714 present for values higher than the mean across all genes and zero otherwise.

#### 715 **Annotation of *cis-trans* protein pairs with protein-protein interactions.**

716 Protein-protein interactions were obtained from the union of CORUM <sup>47</sup>, IntAct <sup>48</sup> and protein-  
717 binding interactions from StringDB <sup>49</sup>. In CORUM, we considered pairwise interactions  
718 between all protein complex subunits. When assessing the consistency of *cis-trans* pQTL  
719 pairs, we discarded any isoform extension from the protein UniProt IDs and intersected the  
720 gene pair with the aggregate protein-protein interactions reference list.

#### 721 **Overlap with disease variants.**

722 Following the approach in <sup>1</sup>, we defined proxy variants of each *cis* QTL as variants in high LD  
723 ( $r^2 > 0.8$ ; based on the UK10K European reference panel<sup>50</sup>) within the same *cis* window. A  
724 QTL was defined as GWAS-tagging if at least one such proxy variant was annotated in the  
725 NHGRI-EBI Gwas catalog (download on 10 April 2018; converted to hg19). We considered a  
726 stringent subset of 21,601 associations for analysis (out of 65,761 total associations), that  
727 were i) genome-wide significant ( $P < 5 \cdot 10^{-8}$ ) and ii) reported in studies with a sample sizes of  
728 at least 1,000, individuals, and iii) for which the effect size (odds ratio) was reported in the  
729 catalogue.

730 To assess the enrichment of different QTL types for GWAS variants, we compared the fraction  
731 of GWAS-tagging QTL variants to sets of random matched control variants that were drawn  
732 from the European 1000G phase 3 <sup>50</sup>, matched for minor allele frequency, the number of  
733 variants in LD (‘LD buddies’;  $r^2 > 0.5$ ), distance to the nearest gene, and gene density, allowing

734 for maximum deviation of +/- 50% for each criterion. For each QTL type, we generated 100  
735 sets of control variants using SNPsnap<sup>51</sup>, based on the respective QTL variants as the input.

## 736 Data availability

737 RNA-Seq data for 331 samples are available on the European Nucleotide Archive (ENA):  
738 study PRJEB7388; accession ERP007111. Proteomics quantifications (protein group and  
739 peptide resolution; MaxQuant output), and run parameters will be available on the PRIDE  
740 Archive (PXD010557).

741

742

743

## 744 References

- 745 1 Kilpinen, H. *et al.* Common genetic variation drives molecular heterogeneity in human  
746 iPSCs. *Nature* **546**, 370-375, doi:10.1038/nature22403 (2017).
- 747 2 Panopoulos, A. D. *et al.* iPSCORE: A Resource of 222 iPSC Lines Enabling Functional  
748 Characterization of Genetic Variation across a Variety of Cell Types. *Stem Cell Reports*  
749 **8**, 1086-1100, doi:10.1016/j.stemcr.2017.03.012 (2017).
- 750 3 Carcamo-Orive, I. *et al.* Analysis of Transcriptional Variability in a Large Human iPSC  
751 Library Reveals Genetic and Non-genetic Determinants of Heterogeneity. *Cell Stem*  
752 *Cell* **20**, 518-532 e519, doi:10.1016/j.stem.2016.11.005 (2017).
- 753 4 Rouhani, F. *et al.* Genetic background drives transcriptional variation in human  
754 induced pluripotent stem cells. *PLoS Genet* **10**, e1004432,  
755 doi:10.1371/journal.pgen.1004432 (2014).
- 756 5 DeBoever, C. *et al.* Large-Scale Profiling Reveals the Influence of Genetic Variation on  
757 Gene Expression in Human Induced Pluripotent Stem Cells. *Cell Stem Cell* **20**, 533-546  
758 e537, doi:10.1016/j.stem.2017.03.009 (2017).
- 759 6 Stark, A. L. *et al.* Protein quantitative trait loci identify novel candidates modulating  
760 cellular response to chemotherapy. *PLoS Genet* **10**, e1004192,  
761 doi:10.1371/journal.pgen.1004192 (2014).
- 762 7 Battle, A. *et al.* Genomic variation. Impact of regulatory variation from RNA to protein.  
763 *Science* **347**, 664-667, doi:10.1126/science.1260793 (2015).
- 764 8 Sun, B. B. *et al.* Genomic atlas of the human plasma proteome. *Nature* **558**, 73-79,  
765 doi:10.1038/s41586-018-0175-2 (2018).

- 766 9 Wu, L. *et al.* Variation and genetic control of protein abundance in humans. *Nature*  
767 **499**, 79-82, doi:10.1038/nature12223 (2013).
- 768 10 Goncalves, E. *et al.* Widespread Post-transcriptional Attenuation of Genomic Copy-  
769 Number Variation in Cancer. *Cell Syst* **5**, 386-398 e384, doi:10.1016/j.cels.2017.08.013  
770 (2017).
- 771 11 Roumeliotis, T. I. *et al.* Genomic Determinants of Protein Abundance Variation in  
772 Colorectal Cancer Cells. *Cell Rep* **20**, 2201-2214, doi:10.1016/j.celrep.2017.08.010  
773 (2017).
- 774 12 Thompson, A. *et al.* Tandem mass tags: a novel quantification strategy for comparative  
775 analysis of complex protein mixtures by MS/MS. *Anal Chem* **75**, 1895-1904 (2003).
- 776 13 Lundberg, E. *et al.* Defining the transcriptome and proteome in three functionally  
777 different human cell lines. *Mol Syst Biol* **6**, 450, doi:10.1038/msb.2010.106 (2010).
- 778 14 Vogel, C. & Marcotte, E. M. Insights into the regulation of protein abundance from  
779 proteomic and transcriptomic analyses. *Nat Rev Genet* **13**, 227-232,  
780 doi:10.1038/nrg3185 (2012).
- 781 15 Kim, M. S. *et al.* A draft map of the human proteome. *Nature* **509**, 575-581,  
782 doi:10.1038/nature13302 (2014).
- 783 16 Kerr, C. L., Hill, C. M., Blumenthal, P. D. & Gearhart, J. D. Expression of pluripotent  
784 stem cell markers in the human fetal testis. *Stem Cells* **26**, 412-421,  
785 doi:10.1634/stemcells.2007-0605 (2008).
- 786 17 Kerr, C. L., Hill, C. M., Blumenthal, P. D. & Gearhart, J. D. Expression of pluripotent  
787 stem cell markers in the human fetal ovary. *Hum Reprod* **23**, 589-599,  
788 doi:10.1093/humrep/dem411 (2008).
- 789 18 Phanstiel, D. H. *et al.* Proteomic and phosphoproteomic comparison of human ES and  
790 iPS cells. *Nat Methods* **8**, 821-827, doi:10.1038/nmeth.1699 (2011).
- 791 19 Munoz, J. *et al.* The quantitative proteomes of human-induced pluripotent stem cells  
792 and embryonic stem cells. *Mol Syst Biol* **7**, 550, doi:10.1038/msb.2011.84 (2011).
- 793 20 Stegle, O., Parts, L., Piipari, M., Winn, J. & Durbin, R. Using probabilistic estimation of  
794 expression residuals (PEER) to obtain increased power and interpretability of gene  
795 expression analyses. *Nat Protoc* **7**, 500-507, doi:10.1038/nprot.2011.457 (2012).
- 796 21 Jun, G. *et al.* A novel Alzheimer disease locus located near the gene encoding tau  
797 protein. *Mol Psychiatry* **21**, 108-117, doi:10.1038/mp.2015.23 (2016).
- 798 22 Patro, R., Duggal, G., Love, M. I., Irizarry, R. A. & Kingsford, C. Salmon provides fast and  
799 bias-aware quantification of transcript expression. *Nat Methods* **14**, 417-419,  
800 doi:10.1038/nmeth.4197 (2017).
- 801 23 Chick, J. M. *et al.* Defining the consequences of genetic variation on a proteome-wide  
802 scale. *Nature* **534**, 500-505, doi:10.1038/nature18270 (2016).
- 803 24 Lizard, G., Rouaud, O., Demarquoy, J., Cherkaoui-Malki, M. & Iuliano, L. Potential roles  
804 of peroxisomes in Alzheimer's disease and in dementia of the Alzheimer's type. *J*  
805 *Alzheimers Dis* **29**, 241-254, doi:10.3233/JAD-2011-111163 (2012).
- 806 25 MacArthur, J. *et al.* The new NHGRI-EBI Catalog of published genome-wide association  
807 studies (GWAS Catalog). *Nucleic Acids Res* **45**, D896-D901, doi:10.1093/nar/gkw1133  
808 (2017).
- 809 26 Yu, H. *et al.* Common variants on 2p16.1, 6p22.1 and 10q24.32 are associated with  
810 schizophrenia in Han Chinese population. *Mol Psychiatry* **22**, 954-960,  
811 doi:10.1038/mp.2016.212 (2017).

- 812 27 Azimi, T. *et al.* Vaccinia Related Kinase 2 (VRK2) expression in neurological disorders:  
813 schizophrenia, epilepsy and multiple sclerosis. *Mult Scler Relat Disord* **19**, 15-19,  
814 doi:10.1016/j.msard.2017.10.017 (2018).
- 815 28 Tesli, M. *et al.* VRK2 gene expression in schizophrenia, bipolar disorder and healthy  
816 controls. *Br J Psychiatry* **209**, 114-120, doi:10.1192/bjp.bp.115.161950 (2016).
- 817 29 Nicolae, D. L. *et al.* Trait-associated SNPs are more likely to be eQTLs: annotation to  
818 enhance discovery from GWAS. *PLoS Genet* **6**, e1000888,  
819 doi:10.1371/journal.pgen.1000888 (2010).
- 820 30 Cayo, M. A. *et al.* A Drug Screen using Human iPSC-Derived Hepatocyte-like Cells  
821 Reveals Cardiac Glycosides as a Potential Treatment for Hypercholesterolemia. *Cell*  
822 *Stem Cell* **20**, 478-489 e475, doi:10.1016/j.stem.2017.01.011 (2017).
- 823 31 Li, Y., Hermanson, D. L., Moriarity, B. S. & Kaufman, D. S. Human iPSC-Derived Natural  
824 Killer Cells Engineered with Chimeric Antigen Receptors Enhance Anti-tumor Activity.  
825 *Cell Stem Cell* **23**, 181-192 e185, doi:10.1016/j.stem.2018.06.002 (2018).
- 826 32 D'Aiuto, L. *et al.* Large-scale generation of human iPSC-derived neural stem cells/early  
827 neural progenitor cells and their neuronal differentiation. *Organogenesis* **10**, 365-377,  
828 doi:10.1080/15476278.2015.1011921 (2014).
- 829 33 Schwartzenuber, J. *et al.* Molecular and functional variation in iPSC-derived sensory  
830 neurons. *Nat Genet* **50**, 54-61, doi:10.1038/s41588-017-0005-8 (2018).
- 831 34 Trim Galore! (2018).
- 832 35 Dobin, A. *et al.* STAR: ultrafast universal RNA-seq aligner. *Bioinformatics* **29**, 15-21,  
833 doi:10.1093/bioinformatics/bts635 (2013).
- 834 36 Zerbino, D. R. *et al.* Ensembl 2018. *Nucleic Acids Res* **46**, D754-D761,  
835 doi:10.1093/nar/gkx1098 (2018).
- 836 37 Liao, Y., Smyth, G. K. & Shi, W. featureCounts: an efficient general purpose program  
837 for assigning sequence reads to genomic features. *Bioinformatics* **30**, 923-930,  
838 doi:10.1093/bioinformatics/btt656 (2014).
- 839 38 Robinson, M. D., McCarthy, D. J. & Smyth, G. K. edgeR: a Bioconductor package for  
840 differential expression analysis of digital gene expression data. *Bioinformatics* **26**, 139-  
841 140, doi:10.1093/bioinformatics/btp616 (2010).
- 842 39 McAlister, G. C. *et al.* MultiNotch MS3 enables accurate, sensitive, and multiplexed  
843 detection of differential expression across cancer cell line proteomes. *Anal Chem* **86**,  
844 7150-7158, doi:10.1021/ac502040v (2014).
- 845 40 Cox, J. & Mann, M. MaxQuant enables high peptide identification rates, individualized  
846 p.p.b.-range mass accuracies and proteome-wide protein quantification. *Nat*  
847 *Biotechnol* **26**, 1367-1372, doi:10.1038/nbt.1511 (2008).
- 848 41 Cox, J. *et al.* Andromeda: a peptide search engine integrated into the MaxQuant  
849 environment. *J Proteome Res* **10**, 1794-1805, doi:10.1021/pr101065j (2011).
- 850 42 Schwanhauser, B. *et al.* Global quantification of mammalian gene expression control.  
851 *Nature* **473**, 337-342, doi:10.1038/nature10098 (2011).
- 852 43 Tyanova, S., Temu, T. & Cox, J. The MaxQuant computational platform for mass  
853 spectrometry-based shotgun proteomics. *Nat Protoc* **11**, 2301-2319,  
854 doi:10.1038/nprot.2016.136 (2016).
- 855 44 Lippert, C., Casale, F. P., Rakitsch, B. & Stegle, O. LIMIX: genetic analysis of multiple  
856 traits. *bioRxiv*, doi: (2015).
- 857 45 Frey, B. J. & Dueck, D. Clustering by passing messages between data points. *Science*  
858 **315**, 972-976, doi:10.1126/science.1136800 (2007).

- 859 46 Ongen, H., Buil, A., Brown, A. A., Dermitzakis, E. T. & Delaneau, O. Fast and efficient  
860 QTL mapper for thousands of molecular phenotypes. *Bioinformatics* **32**, 1479-1485,  
861 doi:10.1093/bioinformatics/btv722 (2016).
- 862 47 Ruepp, A. *et al.* CORUM: the comprehensive resource of mammalian protein  
863 complexes--2009. *Nucleic Acids Res* **38**, D497-501, doi:10.1093/nar/gkp914 (2010).
- 864 48 Orchard, S. *et al.* The MIntAct project--IntAct as a common curation platform for 11  
865 molecular interaction databases. *Nucleic Acids Res* **42**, D358-363,  
866 doi:10.1093/nar/gkt1115 (2014).
- 867 49 Szklarczyk, D. *et al.* The STRING database in 2017: quality-controlled protein-protein  
868 association networks, made broadly accessible. *Nucleic Acids Res* **45**, D362-D368,  
869 doi:10.1093/nar/gkw937 (2017).
- 870 50 Genomes Project, C. *et al.* A global reference for human genetic variation. *Nature* **526**,  
871 68-74, doi:10.1038/nature15393 (2015).
- 872 51 Pers, T. H., Timshel, P. & Hirschhorn, J. N. SNPsnap: a Web-based tool for identification  
873 and annotation of matched SNPs. *Bioinformatics* **31**, 418-420,  
874 doi:10.1093/bioinformatics/btu655 (2015).

875
